# Supplementary material for: Selective and regulated trapping of nicotinic receptor weak base ligands and relevance to smoking cessation
Source: eLife journal article supplement (doi:10.7554/elife.25651), 2017-07-18
Supplement: supp [file elife-25651-supp-v1.zip]

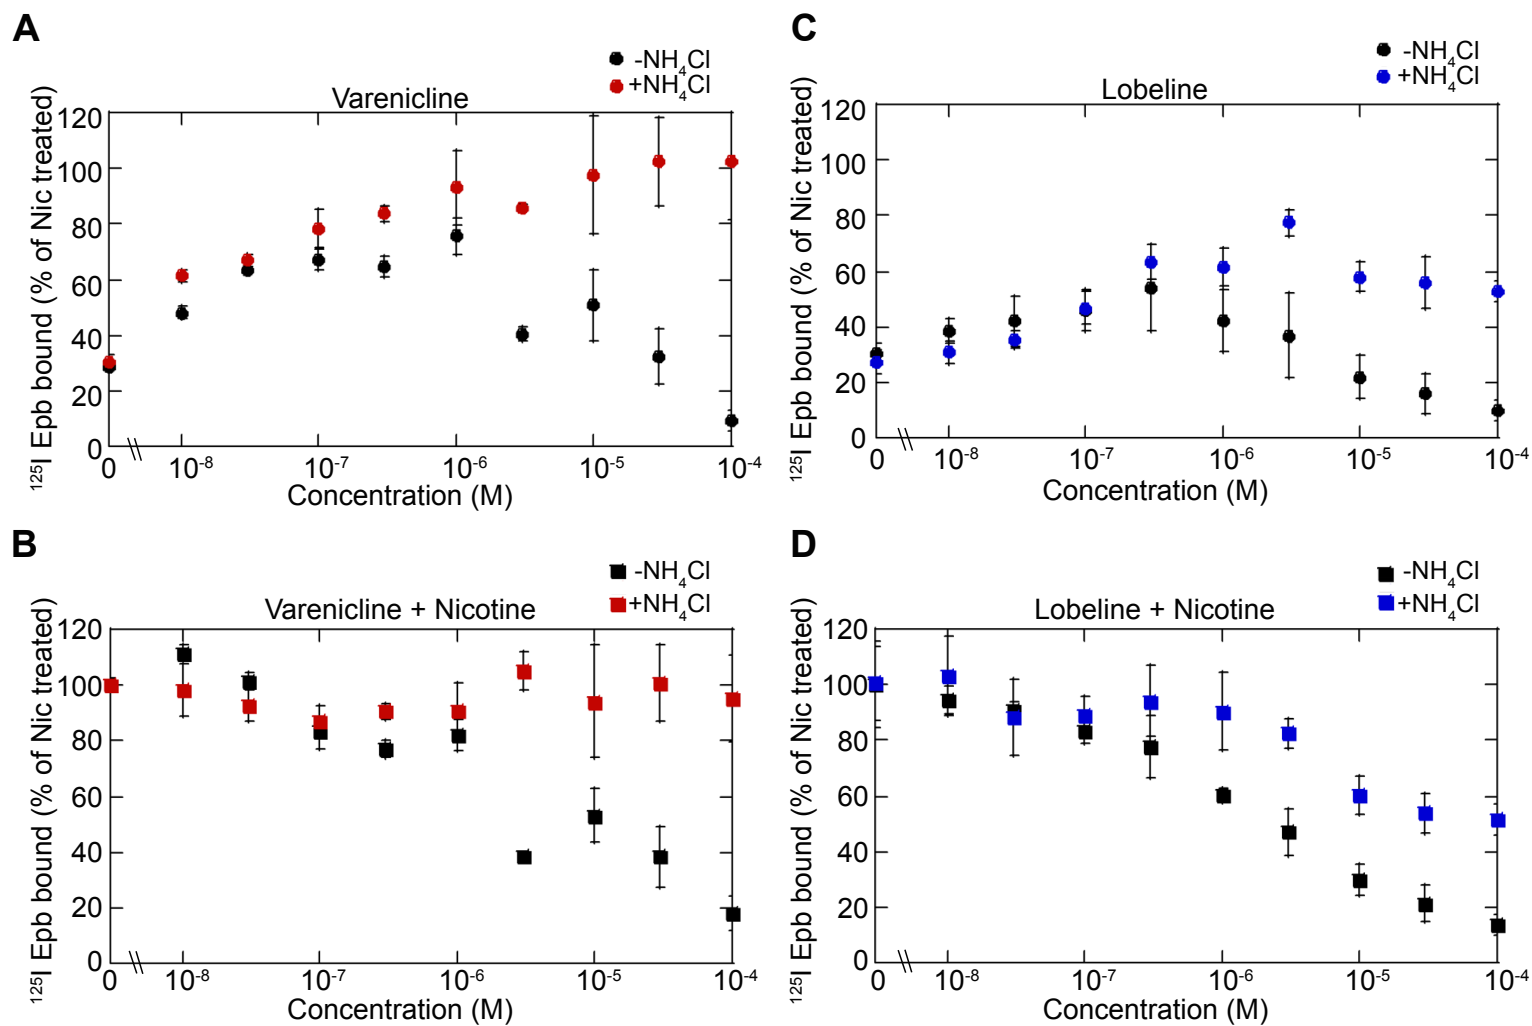

**Figure1-figure supplement 1:** Dose dependence of varenicline and lobeline effects on upregulation
