# Supplementary material for: Selective and regulated trapping of nicotinic receptor weak base ligands and relevance to smoking cessation
Source: eLife journal article supplement (doi:10.7554/elife.25651), 2017-07-18
Supplement: supp [file elife-25651-supp-v1.zip]

**A**

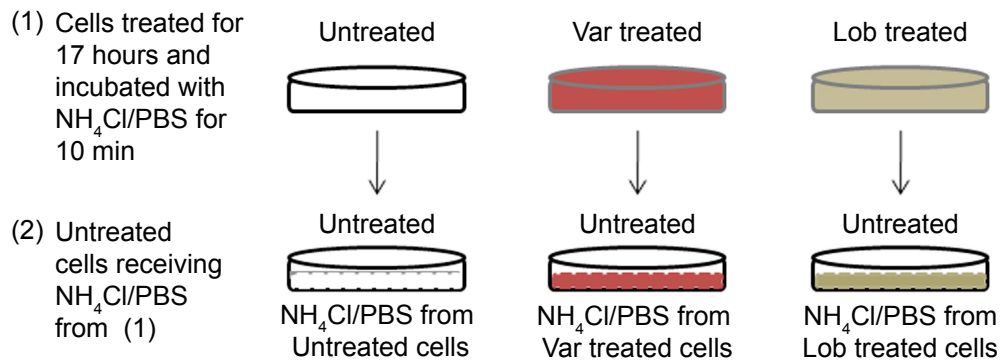

**B**  $^{125}\text{I}$  Epb binding on plates in step (2)

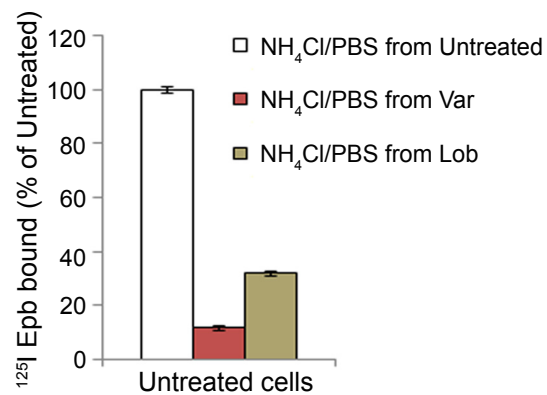

**Figure 1-figure supplement 3:** Release by  $\text{NH}_4\text{Cl}$  treatment of  $\alpha 4\beta 2\text{R}$  ligands trapped inside the acidic compartment.
