# Supplementary material for: Selective and regulated trapping of nicotinic receptor weak base ligands and relevance to smoking cessation
Source: eLife journal article supplement (doi:10.7554/elife.25651), 2017-07-18
Supplement: supp [file elife-25651-supp-v1.zip]

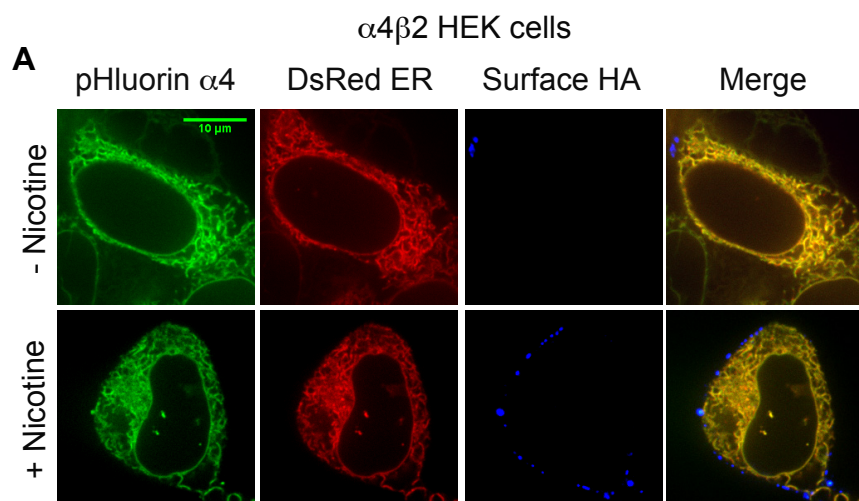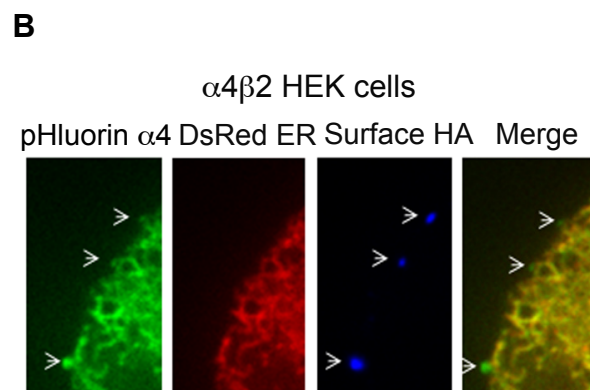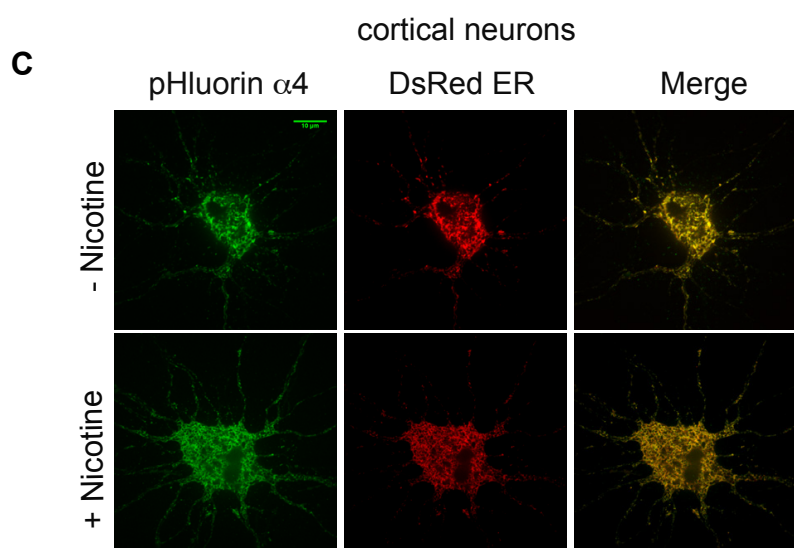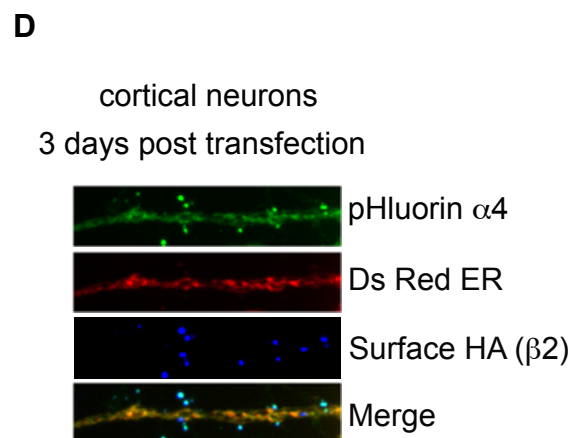

**Figure 5-figure supplement 1:** Subcellular distribution of pHluorin tagged  $\alpha 4$  subunit ( $\alpha 4^{\text{SEP}}$ ) in  $\alpha 4\beta 2$ R-expressing HEK cells and cortical neurons.
