# Supplementary material for: Selective and regulated trapping of nicotinic receptor weak base ligands and relevance to smoking cessation
Source: eLife journal article supplement (doi:10.7554/elife.25651), 2017-07-18
Supplement: supp [file elife-25651-supp-v1.zip]

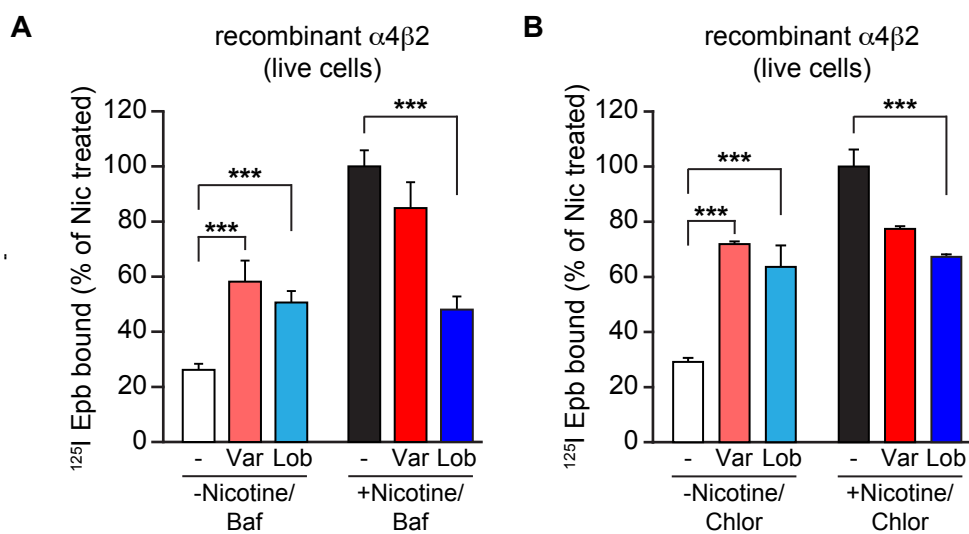

**Figure1-figure supplement 2:** Altering intracellular pH of acidic vesicles alters the effects of varenicline and lobeline
