# Supplementary figures and images for: Selective and regulated trapping of nicotinic receptor weak base ligands and relevance to smoking cessation
Source: eLife journal article supplement (doi:10.7554/elife.25651), 2017-07-18

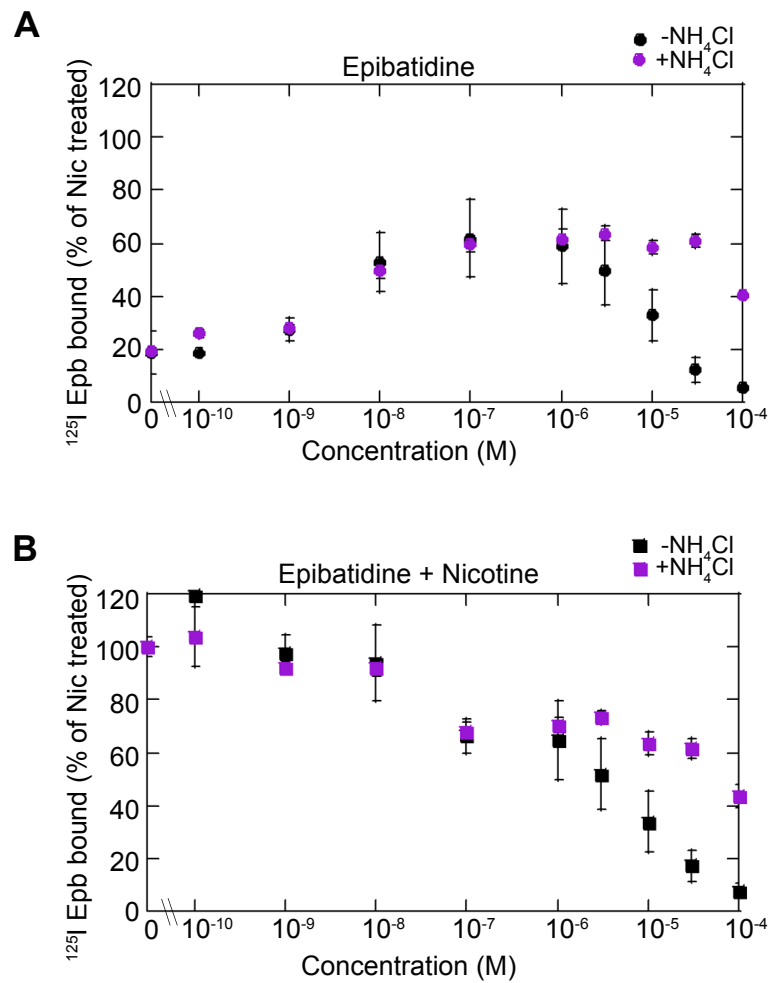

**Figure 3-figure supplement 1:** Dose dependence of epibatidine effects on upregulation.

Supplement: supp [file elife-25651-supp-v1.zip]

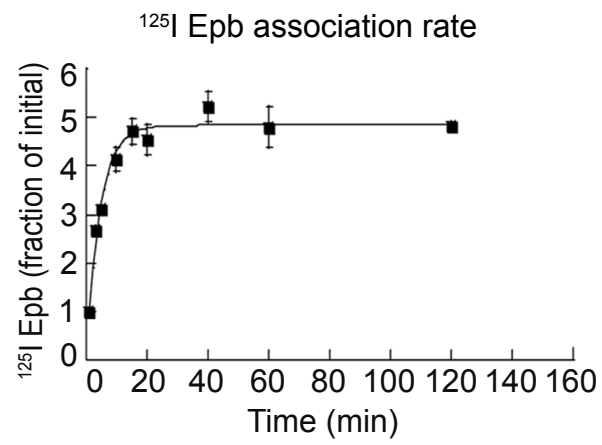

**Figure 4-figure supplement 1:** Association rate of <sup>125</sup>I-epibatidine.

Supplement: supp [file elife-25651-supp-v1.zip]
